# Supplementary material for: Development of a Fermented Bitter Gourd (Momordica charantia)–Grape Beverage Using Optimized Conditions
Source: MDPI journal article supplement (doi:10.3390/fermentation8090439), 2022-09-04
Supplement: s1 [file s1]

**Table S1: One way ANOVA of FRAP Antioxidant activity in the four products.**

|                | Sum of Squares | df    | Mean Square | F          | Sig. |
|----------------|----------------|-------|-------------|------------|------|
| Between Groups | 142375.17      | 3.00  | 47458.39    | 4745838.97 | 0    |
| Within Groups  | 0.08           | 8.00  | 0.01        |            |      |
| Total          | 142375.25      | 11.00 |             |            |      |

**Table S2: One way ANOVA of ABTS Antioxidant activity in the four products.**

|                | Sum of Squares | df    | Mean Square | F          | Sig. |
|----------------|----------------|-------|-------------|------------|------|
| Between Groups | 97876.50       | 3.00  | 32625.50    | 3262550.08 | 0    |
| Within Groups  | 0.08           | 8.00  | 0.01        |            |      |
| Total          | 97876.58       | 11.00 |             |            |      |

**Table S3: Comparison of grape juice and FBGGB with enzyme.**

|                                                                 | t       | Df   | p      | Significant/not significant |
|-----------------------------------------------------------------|---------|------|--------|-----------------------------|
| Alcohol                                                         | -2.12   | 4.00 | 0.10   | S                           |
| Total Titratable Acidity (TTA)                                  | 52.33   | 4.00 | <0.005 | N                           |
| Antioxidant activity - Ferric Reducing Antioxidant Assay (FRAP) | -347.73 | 4.00 | <0.005 | N                           |

**Table S4: Comparison of grape juice and FBGGB without enzyme.**

|                                                                 | T        | Df   | p      | Significant/not significant |
|-----------------------------------------------------------------|----------|------|--------|-----------------------------|
| Alcohol                                                         | -0.89    | 4.00 | 0.42   | S                           |
| Total Titratable Acidity (TTA)                                  | 115.00   | 4.00 | <0.005 | N                           |
| Antioxidant activity - Ferric Reducing Antioxidant Assay (FRAP) | -3452.00 | 4.00 | <0.005 | N                           |

**Table S5: Comparison of bitter gourd juice and FBGGB with enzyme.**

|                                                                 | <b>T</b> | <b>Df</b> | <b>P</b> | <b>Significant/not significant</b> |
|-----------------------------------------------------------------|----------|-----------|----------|------------------------------------|
| Alcohol                                                         | -56.50   | 4.00      | <0.005   | N                                  |
| Total Titratable Acidity (TTA)                                  | -89.80   | 4.00      | <0.005   | N                                  |
| Antioxidant activity - Ferric Reducing Antioxidant Assay (FRAP) | -963.43  | 4.00      | <0.005   | N                                  |
| Antidiabetic potential                                          | -121.20  | 4.00      | <0.005   | N                                  |

**Table S6: Comparison of bitter gourd juice and FBGGB without enzyme.**

|                                                                 | <b>T</b> | <b>Df</b> | <b>P</b> | <b>Significant/not significant</b> |
|-----------------------------------------------------------------|----------|-----------|----------|------------------------------------|
| Alcohol                                                         | -109.00  | 4.00      | <0.005   | N                                  |
| Total Titratable Acidity (TTA)                                  | -86.00   | 4.00      | <0.005   | N                                  |
| Antioxidant activity - Ferric Reducing Antioxidant Assay (FRAP) | -3894.00 | 4.00      | <0.005   | N                                  |
| Antidiabetic potential                                          | -94.36   | 4.00      | <0.005   | N                                  |

**Table S7: Alcohol content in the products.**

|                                                              | <b>Mean</b> | <b>Std. Deviation</b> | <b>Minimum</b> | <b>Maximum</b> |
|--------------------------------------------------------------|-------------|-----------------------|----------------|----------------|
| Grape Juice                                                  | 3.67        | 0.12                  | 3.60           | 3.80           |
| Bitter Gourd Juice                                           | 0.10        | 0                     | 0.10           | 0.10           |
| Fermented Bitter Gourd Grape Beverage (FBGGB) with enzyme    | 3.87        | 0.12                  | 3.80           | 4.00           |
| Fermented Bitter Gourd Grape Beverage (FBGGB) without enzyme | 3.73        | 0.06                  | 3.70           | 3.80           |

**Table S8: ANOVA of Alcohol content.**

|                | <b>Sum of Squares</b> | <b>Df</b> | <b>Mean Square</b> | <b>F</b> | <b>Sig.</b> |
|----------------|-----------------------|-----------|--------------------|----------|-------------|
| Between Groups | 30.13                 | 3.00      | 10.04              | 1339.07  | 0.000       |
| Within Groups  | 0.06                  | 8.00      | 0                  |          |             |
| Total          | 30.19                 | 11.00     |                    |          |             |

**Table S9: Tukey HSD test of Alcohol content in the products.**

| Product (i)                                                  | Product (j)                                                  | Mean Difference (i-j) | p      |
|--------------------------------------------------------------|--------------------------------------------------------------|-----------------------|--------|
| Grape Juice                                                  | Bitter Gourd Juice                                           | 3.57                  | <0.005 |
|                                                              | Fermented Bitter Gourd Grape Beverage (FBGGB) with enzyme    | -0.20                 | 0.02   |
|                                                              | Fermented Bitter Gourd Grape Beverage (FBGGB) without enzyme | -0.07                 | 0.37   |
|                                                              | Grape Juice                                                  | -3.57                 | <0.005 |
| Bitter Gourd Juice                                           | Fermented Bitter Gourd Grape Beverage (FBGGB) with enzyme    | -3.77                 | <0.005 |
|                                                              | Fermented Bitter Gourd Grape Beverage (FBGGB) without enzyme | -3.63                 | <0.005 |
|                                                              | Grape Juice                                                  | 0.20                  | 0.02   |
| Fermented Bitter Gourd Grape Beverage (FBGGB) with enzyme    | Bitter Gourd Juice                                           | 3.77                  | <0.005 |
|                                                              | Fermented Bitter Gourd Grape Beverage (FBGGB) without enzyme | 0.13                  | 0.10   |
|                                                              | Grape Juice                                                  | 0.07                  | 0.37   |
| Fermented Bitter Gourd Grape Beverage (FBGGB) without enzyme | Bitter Gourd Juice                                           | 3.63                  | <0.005 |
|                                                              | Fermented Bitter Gourd Grape Beverage (FBGGB) with enzyme    | -0.13                 | 0.10   |
